# Supplementary material for: Combination of oligo-fractionated irradiation with nivolumab can induce immune modulation in gastric cancer
Source: PubMed Central journal article supplement — J Immunother Cancer. 2024 Jan 30;12(1):e008385. doi: 10.1136/jitc-2023-008385 (PMC10828861; doi:10.1136/jitc-2023-008385), 2024-01-30
Supplement: jitc-2023-008385supp001.pdf [file jitc-2023-008385supp001.pdf]

## Supplementary Fig. S1

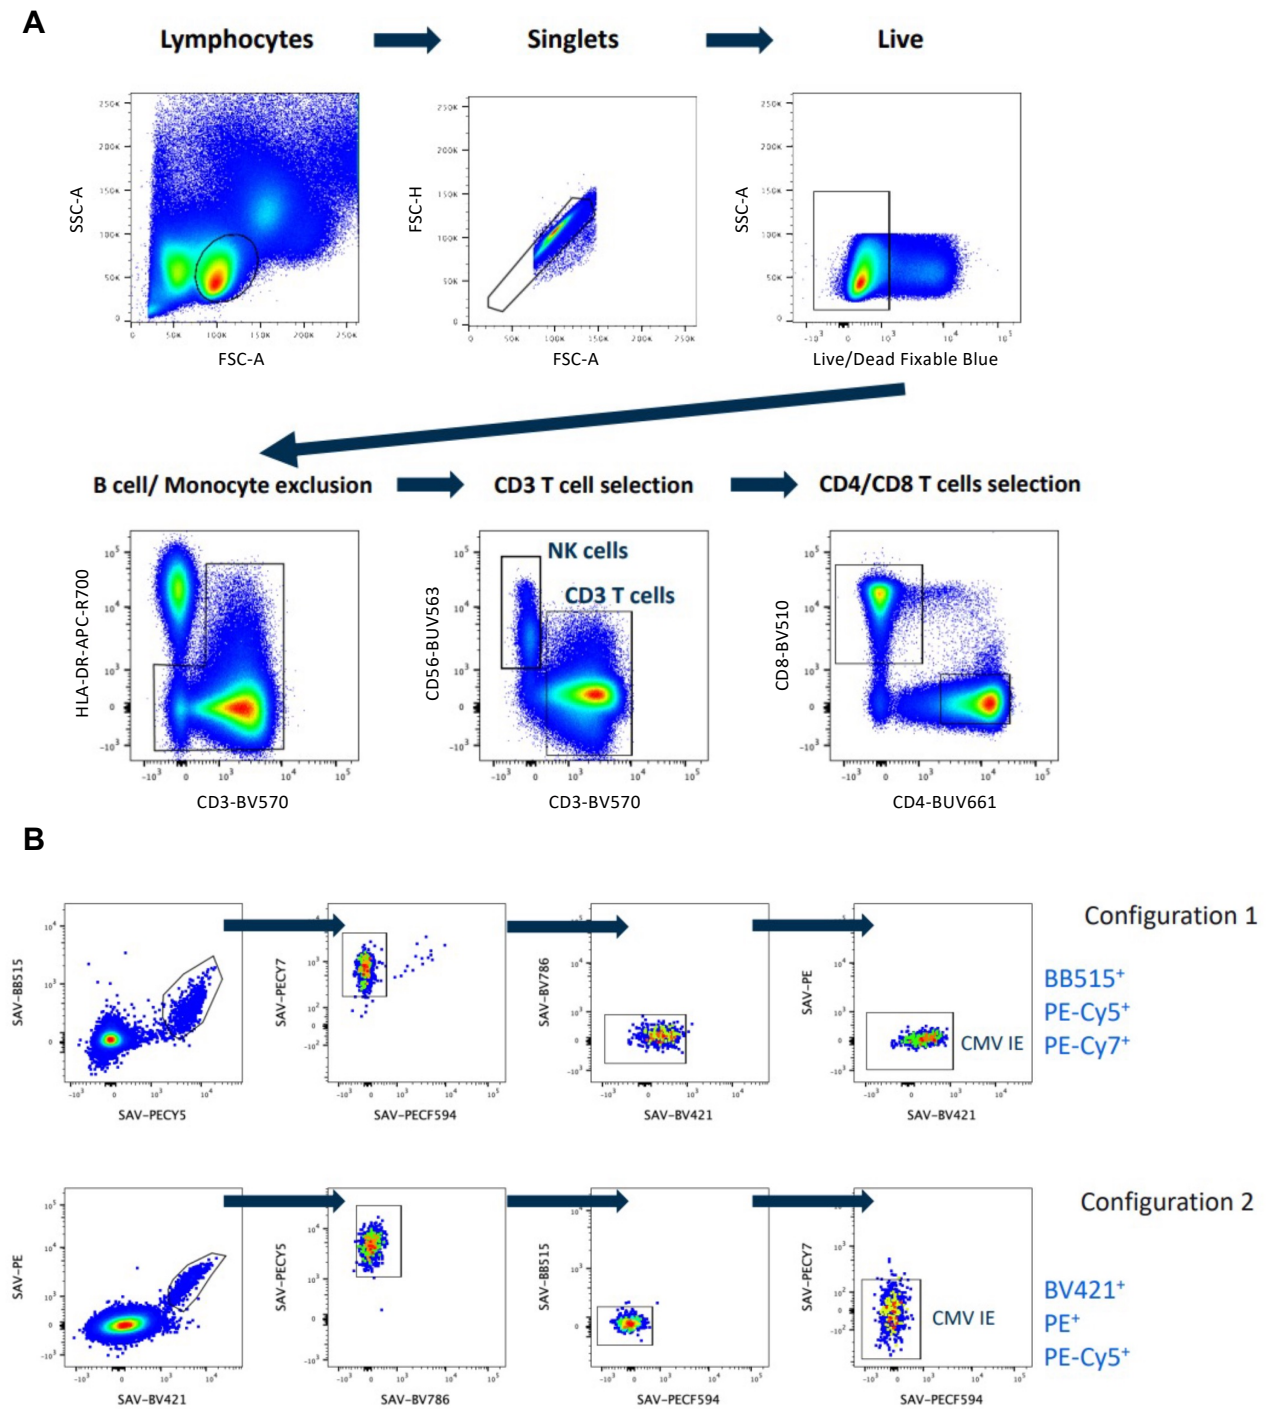

**Supplementary Fig. S1.** Gating strategy in flow cytometry. (A) A classical gating strategy. (B) Identification of antigen-specific CD8(+) T cells: Triple coding, 2 configuration staining. The detection criteria were described in METHODS.

## Supplementary Fig. S2

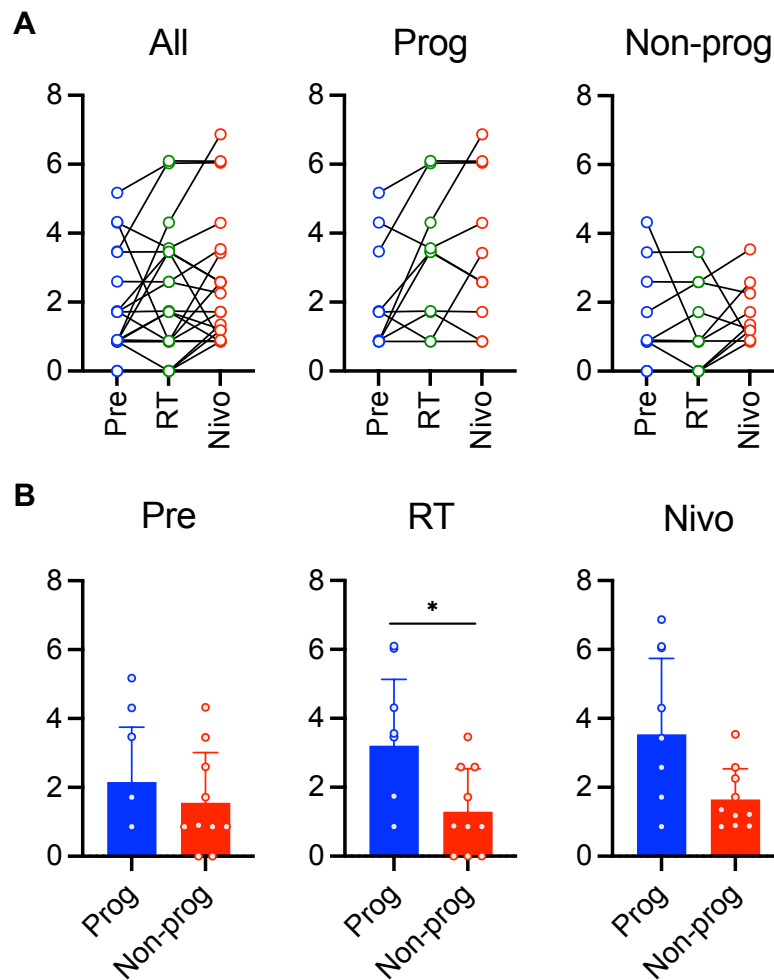

**Supplementary Fig. S2.** Tumor mutational burden (TMB) score during treatment. TMB analysis using circulating tumor DNA derived from peripheral blood plasma. Summarized TMB score was analyzed during treatment (A) and between progressors (Prog) and non-progressors (Non-prog) (B). \* $p < 0.05$ . Error bars represent  $\pm$  SD. All, all patients; Nivo, after nivolumab administrations; Pre, before treatment; RT, after radiotherapy.

**Supplementary Table S1.** Antibodies used in the highly multiplexed flow cytometric analysis for immune cell subset discrimination and phenotypic profiling.

| Antibody target | Fluorochrome      | Antibody clone | Vendor         |
|-----------------|-------------------|----------------|----------------|
| TIGIT           | BUV395            | 741182         | BD Biosciences |
| CD25            | BUV615            | 2A3            | BD Biosciences |
| KLRG1           | PerCP-eFluor™ 710 | 13F12F2        | eBioscience™   |
| PD-1            | BV650             | EH12           | BD Biosciences |
| TIM-3           | BV711             | 7D3            | BD Biosciences |
| CD160           | Alexa Fluor® 647  | BY55           | BD Biosciences |
| CD56            | BUV563            | NCAM16.2       | BD Biosciences |
| CD4             | BUV661            | SK3            | BD Biosciences |
| CD45RO          | BUV737            | UCHL1          | BD Biosciences |
| CD27            | BUV805            | L128           | BD Biosciences |
| CXCR5           | BV480             | RF8B2          | BD Biosciences |
| CD8             | BV510             | RPA-T8         | BioLegend      |
| CD3             | BV570             | UCHT1          | BioLegend      |
| CD127           | BV605             | HIL-7R-M21     | BD Biosciences |
| HLA-DR          | APC-R700          | G46-6          | BD Biosciences |
| CD39            | APC/Fire 750      | A1             | BioLegend      |

**Supplementary Table S2.** A list of 56 epitopes restricted to HLA-A02:01 or HLA-A24:02, which included 46 TAAs and 10 virus antigens.

| HLA-A*02:01  |             |                  |                                              |     |
|--------------|-------------|------------------|----------------------------------------------|-----|
| No           | HLA allele  | Peptide sequence | Antigen                                      | Ref |
| <b>TAA</b>   |             |                  |                                              |     |
| 1            | HLA-A*02:01 | PLDFSWLSL        | Bcl-2 208-217                                | #1  |
| 2            | HLA-A*02:01 | WLSLKLTL         | Bcl-2 214-223                                | #1  |
| 3            | HLA-A*02:01 | CLPSPSTPV        | BMI1 271-279                                 | #2  |
| 4            | HLA-A*02:01 | TLQDIVYKL        | BMI1 74-82                                   | #2  |
| 5            | HLA-A*02:01 | YLSGANLNL        | Carcinogenic Embryonic Antigen (CEA) 571-579 | #3  |
| 6            | HLA-A*02:01 | YLNVTQPTCV       | EGF-R 1138-1147                              | #4  |
| 7            | HLA-A*02:01 | TLADFDPV         | EphA2                                        | #5  |
| 8            | HLA-A*02:01 | LIAHNQVRQV       | HER-2/neu (85-94)                            | #6  |
| 9            | HLA-A*02:01 | KIFGSLAFL        | HER-2/neu 369-377                            | #7  |
| 10           | HLA-A*02:01 | KLMSSNSTDL       | HSP105 234-243                               | #8  |
| 11           | HLA-A*02:01 | GLYDGMHL         | MAGEA-10 254-262                             | #9  |
| 12           | HLA-A*02:01 | FLWGPVALV        | MAGEA3 271-279                               | #10 |
| 13           | HLA-A*02:01 | GVYDGREHTV       | MAGE-A4 230-239                              | #11 |
| 14           | HLA-A*02:01 | LLFGLALIEV       | MAGE-C2 191-200                              | #12 |
| 15           | HLA-A*02:01 | VLPLTVAEV        | Mesothelin 530-538                           | #13 |
| 16           | HLA-A*02:01 | SLLFLFSL         | MSLN mesothelin                              | #13 |
| 17           | HLA-A*02:01 | YLFFYRKSV        | hTERT 572-580                                | #14 |
| 18           | HLA-A*02:01 | LLLLTVLTV        | MUC-1 12-20                                  | #15 |
| 19           | HLA-A*02:01 | SLLMWITQV        | NY-ESO-1 157-165                             | #16 |
| 20           | HLA-A*02:01 | SLPPPQTRV        | p53 149-157                                  | #17 |
| 21           | HLA-A*02:01 | VLDGLDVLL        | PRAME 100-108                                | #18 |
| 22           | HLA-A*02:01 | LMLGEFLKL        | Survivin 96-104                              | #19 |
| 23           | HLA-A*02:01 | ILAKFLHWL        | Telomerase 540-548                           | #20 |
| 24           | HLA-A*02:01 | RMFPNAPYL        | WT-1 126-134 (Wilms tumor)                   | #21 |
| <b>Virus</b> |             |                  |                                              |     |
| 1            | HLA-A*02:01 | NLVPVATV         | pp65/CMV                                     | #22 |
| 2            | HLA-A*02:01 | VLEETSVML        | IE-1/CMV                                     | #22 |
| 3            | HLA-A*02:01 | CLGGLLTMV        | LMP-2A/EBV                                   | #23 |
| 4            | HLA-A*02:01 | GILGFVFTL        | MP/Influenza                                 | #24 |

  

| HLA-A*24:02  |             |                  |                                              |         |
|--------------|-------------|------------------|----------------------------------------------|---------|
| No           | HLA allele  | Peptide sequence | Antigen                                      | Ref     |
| <b>TAA</b>   |             |                  |                                              |         |
| 1            | HLA-A*24:02 | DYLYVYVLI        | BCL-2A1                                      | #25     |
| 2            | HLA-A*24:02 | EYRALQLHL        | Carbonic anhydrase CA9 219-227               | #26     |
| 3            | HLA-A*24:02 | TYACFVSNL        | Carcinogenic Embryonic Antigen (CEA) 652-660 | #27     |
| 4            | HLA-A*24:02 | IYTWIEDHF        | FOXM1 262-270                                | #28     |
| 5            | HLA-A*24:02 | EYILSLEEL        | Glycipan 3                                   | #29     |
| 6            | HLA-A*24:02 | TYLPTNASL        | HER-2/neu 63-71                              | #30     |
| 7            | HLA-A*24:02 | KYYLRVRPLL       | KIF20A                                       | #28, 31 |
| 8            | HLA-A*24:02 | VYLRVRPLL        | KIF20A 67-75                                 | #28, 31 |
| 9            | HLA-A*24:02 | EYQLVFGI         | MAGEA2 156-164                               | #32     |
| 10           | HLA-A*24:02 | HMPKAGLLI        | MAGE-A3                                      | #33     |
| 11           | HLA-A*24:02 | TFPDLSEF         | MAGEA3 97-105                                | #33     |
| 12           | HLA-A*24:02 | EYCPGGNLF        | MELK 87-95 (93N)                             | #34     |
| 13           | HLA-A*24:02 | DYLNEWGSRF       | p-Cadherin                                   | #35     |
| 14           | HLA-A*24:02 | AYACNTSTL        | Survivin 80-88                               | #36     |
| 15           | HLA-A*24:02 | VYGFVRACL        | hTRT 461-469                                 | #37     |
| 16           | HLA-A*24:02 | SYRNEIAYL        | TTK protein kinase 551-559                   | #38     |
| 17           | HLA-A*24:02 | RYCNLEGPPI       | ULRC10/LY6K-177                              | #28     |
| 18           | HLA-A*24:02 | SYGVLLWEI        | VEGFR1-1084                                  | #39     |
| 19           | HLA-A*24:02 | RFVDPGNRI        | VEGFR2-169                                   | #39     |
| 20           | HLA-A*24:02 | CYTWNQMNL        | WT1                                          | #40     |
| 21           | HLA-A*24:02 | EYYELFVNI        | DEPDC1-294                                   | #28     |
| 22           | HLA-A*24:02 | KTVNELQNL        | IMP3-508                                     | #38     |
| <b>Virus</b> |             |                  |                                              |         |
| 1            | HLA-A*24:02 | QYDPAALF         | pp65/CMV                                     | #28     |
| 2            | HLA-A*24:02 | VYALPLKML        | pp65/CMV                                     | #41     |
| 3            | HLA-A*24:02 | AYAQKIFKI        | IE-1/CMV                                     | #42     |
| 4            | HLA-A*24:02 | TYGPVFMSL        | LMP2/EBV                                     | #43     |
| 5            | HLA-A*24:02 | DYCNVNLKEF       | BRLF1/EBV                                    | #44     |
| 6            | HLA-A*24:02 | TYQWIRNW         | PB2/Influenza                                | #45     |

HLA, human leukocyte antigen; Ref, reference; TAA, tumor-associated antigen.

**Supplementary Table S3.** Summary of treatments administered prior to the treatment protocol of CIRCUIT trial.

|            | 1st treatment | 2nd treatment   | 3rd treatment | 4th treatment |
|------------|---------------|-----------------|---------------|---------------|
| P1         | SOX           | RAM + PTX       |               |               |
| P2         | SOX           | RAM + PTX       |               |               |
| P3         | DS            | SP              | RAM + PTX     |               |
| P4         | DS            | XP + HER        | RAM + nab-PTX |               |
| P5         | SP            | RAM + nab-PTX   |               |               |
| P6         | SP            | SOX             | RAM + PTX     |               |
| P7         | SP            | XP + HER        | RAM + PTX     | DS            |
| P8         | SOX           | RAM + nab-PTX   |               |               |
| P9         | SP            | RAM + PTX       |               |               |
| P10        | XP + HER      | XELOX + HER     | RAM + PTX     | RAM + nab-PTX |
| P11        | XP + HER      | RAM + nab-PTX   |               |               |
| P12        | DCS           | RAM + nab-PTX   |               |               |
| P13        | DCS           | biweekly CPT-11 | weekly PTX    |               |
| P14        | SOX           | PTX + RAM       |               |               |
| P15        | XP + HER      | RAM + nab-PTX   |               |               |
| P16        | SOX           | nab-PTX         | RAM + nab-PTX |               |
| P17        | SOX           | RAM + PTX       |               |               |
| <i>P18</i> | XP + HER      | SP + HER        | RAM + PTX     |               |
| <i>P19</i> | SP            | RAM + nab-PTX   |               |               |
| <i>P20</i> | SP            | RAM + PTX       | LAK           |               |

Cases with italicized case number were survivors alive as of the data of confirmation of survival. CDDP, cisplatin; CPT-11, irinotecan; DTX, docetaxel; HER, trastuzumab; LAK, lymphokine activated killer; nab-PTX, nanoparticle albumin-bound paclitaxel; PTX, paclitaxel; RAM, ramucirumab; DCS, docetaxel + cisplatin + tegafur/gimeracil/oteracil; DS, docetaxel + tegafur/gimeracil/oteracil; SOX, tegafur/gimeracil/oteracil + oxaliplatin; SP, tegafur/gimeracil/oteracil + cisplatin; XELOX, capecitabine + oxaliplatin; XP, capecitabine + cisplatin.

**Supplementary Table S4.** The basic stat of the TCR repertoire analysis.

| No. | Time-points | Number of Tcells ( $\mu$ l) | Read count* | Clones detected** |
|-----|-------------|-----------------------------|-------------|-------------------|
| P1  | Pre         | 1,254                       | 176,416     | 19,036            |
|     | RT          | 753                         | 79,805      | 9,340             |
|     | Nivo        | 1,341                       | 145,840     | 11,736            |
| P2  | Pre         | 1,537                       | 95,004      | 5,695             |
|     | RT          | 590                         | 110,225     | 7,616             |
|     | Nivo        | 486                         | 151,817     | 10,846            |
| P3  | Pre         | 1,662                       | 82,744      | 14,113            |
|     | RT          | 1,261                       | 155,266     | 14,712            |
|     | Nivo        | 1,135                       | 135,140     | 14,865            |
| P4  | Pre         | 1,736                       | 128,091     | 29,428            |
|     | RT          | 1,414                       | 163,078     | 25,169            |
|     | Nivo        | 740                         | 148,483     | 20,388            |
| P5  | Pre         | 1,527                       | 162,449     | 18,826            |
|     | RT          | 951                         | 172,581     | 14,099            |
|     | Nivo        | 933                         | 199,660     | 17,414            |
| P6  | Pre         | 1,655                       | 136,482     | 13,819            |
|     | RT          | 1,311                       | 198,776     | 13,315            |
|     | Nivo        | 1,551                       | 90,151      | 11,556            |
| P7  | Pre         | 1,537                       | 190,299     | 22,150            |
|     | RT          | 2,559                       | 177,283     | 15,672            |
|     | Nivo        | 1,645                       | 213,904     | 24,269            |
| P8  | Pre         | 802                         | 199,918     | 16,872            |
|     | RT          | 866                         | 153,061     | 11,582            |
|     | Nivo        | 715                         | 160,164     | 12,388            |
| P9  | Pre         | 1,820                       | 145,748     | 11,723            |
|     | RT          | 1,530                       | 187,995     | 13,579            |
|     | Nivo        | 1,701                       | 124,525     | 8,903             |
| P10 | Pre         | 1,142                       | 170,026     | 12,313            |
|     | RT          | 688                         | 73,234      | 5,078             |
|     | Nivo        | 1,018                       | 148,645     | 9,878             |
| P11 | Pre         | 1,798                       | 154,719     | 19,370            |
|     | RT          | 869                         | 88,178      | 10,969            |
|     | Nivo        | 1,106                       | 109,059     | 13,926            |
| P12 | Pre         | 938                         | 190,391     | 17,392            |
|     | RT          | 682                         | 154,430     | 12,064            |
|     | Nivo        | 555                         | 220,345     | 15,937            |
| P13 | Pre         | 2,901                       | 141,057     | 27,821            |
|     | RT          | 1,728                       | 115,057     | 10,061            |
|     | Nivo        | 1,631                       | 88,628      | 8,327             |
| P14 | Pre         | 1,889                       | 121,126     | 12,969            |
|     | RT          | 963                         | 139,119     | 11,230            |
|     | Nivo        | 1,003                       | 129,620     | 15,382            |
| P15 | Pre         | 1,686                       | 67,061      | 17,153            |
|     | RT          | 1,728                       | 133,858     | 18,429            |
|     | Nivo        | 1,125                       | 146,390     | 19,982            |
| P16 | Pre         | 2,080                       | 193,173     | 20,107            |
|     | RT          | 1,441                       | 167,697     | 18,615            |
|     | Nivo        | 1,562                       | 174,364     | 19,708            |
| P17 | Pre         | 1,279                       | 82,554      | 9,868             |
|     | RT          | 1,138                       | 164,487     | 15,120            |
|     | Nivo        | 1,192                       | 125,863     | 14,995            |
| P18 | Pre         | 1,114                       | 120,606     | 20,709            |
|     | RT          | 774                         | 148,523     | 18,021            |
|     | Nivo        | 892                         | 80,862      | 18,129            |
| P19 | Pre         | 1,027                       | 164,485     | 21,588            |
|     | RT          | 726                         | 231,327     | 23,541            |
|     | Nivo        | 1,095                       | 181,699     | 22,006            |
| P20 | Pre         | 1,261                       | 170,012     | 18,767            |
|     | RT          | 842                         | 99,198      | 8,051             |
|     | Nivo        | 844                         | 135,481     | 10,619            |

Cases with italicized case number were survivors alive as of the data of confirmation of survival. \*Read count (assigned reads): Number of reads in which TCR genes were aligned with reference sequences.

\*\*Clones detected (assigned reads): Number of reads with unique combination. TCR, T cell receptor.

**Supplementary Table S5.** Concentration of ctDNA.

| No. | Time-points | ctDNA concentration (ng/μl) |
|-----|-------------|-----------------------------|
| P1  | Pre         | 24.2                        |
|     | RT          | 58.8                        |
|     | Nivo        | 51.2                        |
| P2  | Pre         | 1.38                        |
|     | RT          | 0.688                       |
|     | Nivo        | 1.31                        |
| P3  | Pre         | 1.84                        |
|     | RT          | 1.82                        |
|     | Nivo        | 5.24                        |
| P4  | Pre         | 2.62                        |
|     | RT          | 1.74                        |
|     | Nivo        | 3.26                        |
| P5  | Pre         | 2.2                         |
|     | RT          | 2.5                         |
|     | Nivo        | 4.18                        |
| P6  | Pre         | 2.84                        |
|     | RT          | 2.84                        |
|     | Nivo        | 6.8                         |
| P7  | Pre         | 10.2                        |
|     | RT          | 13.3                        |
|     | Nivo        | 25.2                        |
| P8  | Pre         | 0.968                       |
|     | RT          | 0.954                       |
|     | Nivo        | 1.16                        |
| P9  | Pre         | 0.982                       |
|     | RT          | 1.52                        |
|     | Nivo        | 1.04                        |
| P10 | Pre         | 8.36                        |
|     | RT          | 8.14                        |
|     | Nivo        | 10.6                        |
| P11 | Pre         | 1.47                        |
|     | RT          | 1.33                        |
|     | Nivo        | 1.68                        |
| P12 | Pre         | 2.2                         |
|     | RT          | 1.41                        |
|     | Nivo        | 1.22                        |
| P13 | Pre         | 1.62                        |
|     | RT          | 2.2                         |
|     | Nivo        | 6.08                        |
| P14 | Pre         | 2.36                        |
|     | RT          | 1.19                        |
|     | Nivo        | 1.3                         |
| P15 | Pre         | 1.99                        |
|     | RT          | 1                           |
|     | Nivo        | 0.21                        |
| P16 | Pre         | 1.17                        |
|     | RT          | 2.42                        |
|     | Nivo        | 1.45                        |
| P17 | Pre         | 2.82                        |
|     | RT          | 2.06                        |
|     | Nivo        | 2.06                        |
| P18 | Pre         | 0.8                         |
|     | RT          | 1.07                        |
|     | Nivo        | 1.07                        |
| P19 | Pre         | 0.916                       |
|     | RT          | 0.704                       |
|     | Nivo        | 0.566                       |
| P20 | Pre         | 1.69                        |
|     | RT          | 1.73                        |
|     | Nivo        | 2.18                        |

Cases with italicized case number were survivors alive as of the data of confirmation of survival. ctDNA, circulating tumor DNA.

**Supplementary Table S6.** Frequency and cell count of TAA- and virus-specific CD8(+) T cells.

| HLA allele            |                      |            | HLA-A24:02           |            |             |                        |             | HLA-A02:01           |               |                        |             |              |
|-----------------------|----------------------|------------|----------------------|------------|-------------|------------------------|-------------|----------------------|---------------|------------------------|-------------|--------------|
| Antigen               | Peptide sequence     |            | TAA (% (cell count)) |            |             | Virus (% (cell count)) |             | TAA (% (cell count)) |               | Virus (% (cell count)) |             |              |
|                       |                      |            | MELK 87-95           | p-Cadherin | DEPDC1-294  | pp65/CMV               | IE-1/CMV    | ITERT 572-590        | FRAME 100-108 | pp65/CMV               | IE-1/CMV    | MP/Influenza |
|                       |                      |            | EYCPGGNLF            | DYLNEWGSRF | EYYELFVNI   | QYDPVAALF              | AYAOKIFKI   | YLFYRKSIV            | VLDGLDVL      | NLVPVMVATV             | VLEETSVML   | GILGFVFTL    |
| Prog                  | P2<br>(73)<br>(PD)   | Pre        |                      |            |             |                        |             |                      |               |                        | 3.74 (244)  |              |
|                       |                      | RT         |                      |            |             |                        |             |                      |               |                        | 6.44 (9125) | 0.0057 (8)   |
|                       |                      | Nivo       |                      |            |             |                        |             |                      |               | 0.0035 (5)             |             | 10.8 (13094) |
|                       | P3<br>(83)<br>(PD)   | Pre        |                      |            |             | 0.031 (43)             |             |                      |               |                        |             |              |
|                       |                      | RT         |                      |            |             | 0.039 (27)             |             |                      |               |                        |             |              |
|                       |                      | Nivo       |                      |            |             | 0.056 (54)             |             |                      |               |                        |             |              |
|                       | P4<br>(95)<br>(PD)   | Pre        |                      |            |             | 0.0021 (4)             | 0.0054 (10) |                      |               |                        |             |              |
|                       |                      | RT         |                      |            |             |                        | 0.011 (10)  |                      |               |                        |             |              |
|                       |                      | Nivo       |                      |            |             |                        |             |                      |               |                        |             |              |
|                       | P6<br>(158)<br>(PD)  | Pre        |                      |            |             |                        | 0.0036 (19) |                      |               |                        |             |              |
|                       |                      | RT         | 0.0032 (13)          |            |             |                        | 0.0056 (23) |                      |               |                        |             |              |
|                       |                      | Nivo       | 0.0068 (28)          |            |             |                        | 0.0046 (19) |                      |               |                        |             |              |
|                       | P7<br>(167)<br>(PD)  | Pre        |                      |            |             | 0.28 (450)             |             |                      |               |                        |             |              |
|                       |                      | RT         |                      |            |             | 0.42 (447)             |             |                      |               |                        |             |              |
|                       |                      | Nivo       |                      |            |             | 0.61 (955)             |             |                      |               |                        |             |              |
|                       | P8<br>(174)<br>(PD)  | Pre        |                      | 0.0033 (4) |             |                        |             |                      |               |                        |             |              |
| RT                    |                      |            |                      |            |             |                        |             |                      |               |                        |             |              |
| Nivo                  |                      |            | 0.0051 (10)          |            |             |                        |             |                      |               |                        |             |              |
| P9<br>(202)<br>(PD)   | Pre                  |            |                      |            | 0.0077 (23) | 0.74 (2277)            |             |                      |               |                        |             |              |
|                       | RT                   |            |                      |            | 0.085 (16)  | 0.28 (52)              |             |                      |               |                        |             |              |
|                       | Nivo                 |            |                      |            | 0.064 (200) | 0.68 (2119)            |             |                      |               |                        |             |              |
| P10<br>(290)<br>(PD)  | Pre                  |            |                      |            |             |                        |             |                      |               |                        | 0.0043 (19) |              |
|                       | RT                   |            |                      |            |             |                        |             |                      |               | 1.47 (6476)            | 0.0045 (9)  |              |
|                       | Nivo                 |            |                      |            |             |                        |             |                      |               | 1.29 (2232)            | 1.24 (1955) |              |
| Non-prog              | P11<br>(303)<br>(SD) | Pre        |                      |            |             |                        |             |                      |               |                        |             |              |
|                       |                      | RT         |                      |            |             |                        |             |                      |               |                        |             |              |
|                       |                      | Nivo       |                      |            |             | 0.0035 (12)            |             |                      |               |                        |             |              |
|                       | P12<br>(330)<br>(SD) | Pre        |                      |            |             |                        | 0.001 (4)   |                      |               |                        |             |              |
|                       |                      | RT         |                      |            |             |                        |             |                      |               |                        |             |              |
|                       |                      | Nivo       |                      |            |             |                        |             |                      |               |                        |             |              |
|                       | P13<br>(342)<br>(SD) | Pre        |                      |            |             |                        | 0.0018 (12) | 0.002 (13)           |               |                        | 0.46 (3025) | 0.0027 (18)  |
|                       |                      | RT         |                      |            |             | 0.0012 (6)             | 0.0017 (8)  | 0.00085 (4)          |               |                        | 0.25 (1189) | 0.0023 (11)  |
|                       |                      | Nivo       |                      |            |             |                        | 0.0034 (13) | 0.0038 (15)          |               |                        | 0.30 (1133) | 0.0016 (6)   |
|                       | P14<br>(435)<br>(PR) | Pre        | 0.0049 (14)          |            |             |                        |             |                      |               |                        |             |              |
|                       |                      | RT         | 0.019 (10)           |            |             |                        |             |                      |               |                        |             |              |
|                       |                      | Nivo       | 0.009 (17)           |            |             |                        |             |                      |               |                        |             |              |
|                       | P15<br>(651)<br>(CR) | Pre        |                      |            |             | 0.057 (73)             | 2.7 (3489)  |                      |               |                        |             |              |
|                       |                      | RT         |                      |            |             | 0.089 (83)             | 2.5 (2356)  |                      |               |                        |             |              |
| Nivo                  |                      |            |                      |            | 0.051 (31)  | 1.69 (1050)            |             |                      |               |                        |             |              |
| P17<br>(1111)<br>(SD) | Pre                  |            |                      |            |             |                        |             |                      |               | 0.073 (156)            |             |              |
|                       | RT                   |            |                      |            |             |                        |             |                      |               | 0.15 (198)             |             |              |
|                       | Nivo                 |            |                      |            |             |                        |             |                      |               | 0.037 (68)             |             |              |
| P18<br>(1118)<br>(CR) | Pre                  |            |                      |            |             | 0.004 (7)              |             |                      |               |                        |             |              |
|                       | RT                   |            |                      | 0.0078 (7) |             |                        |             |                      |               |                        |             |              |
|                       | Nivo                 |            |                      |            |             |                        |             |                      |               |                        |             |              |
| P19<br>(1160)<br>(CR) | Pre                  |            |                      |            |             | 0.05 (106)             |             |                      |               |                        |             |              |
|                       | RT                   | 0.014 (13) | 0.024 (22)           |            |             | 0.12 (111)             |             |                      |               |                        |             |              |
|                       | Nivo                 | 0.015 (7)  |                      |            |             | 0.23 (105)             |             |                      |               |                        |             |              |
| P20<br>(1489)<br>(PR) | Pre                  | 0.0058 (9) |                      |            |             | 0.011 (17)             |             |                      |               |                        |             |              |
|                       | RT                   |            |                      |            |             |                        |             |                      |               |                        |             |              |
|                       | Nivo                 |            |                      |            |             | 0.0059 (7)             |             |                      |               |                        |             |              |

Cases with italicized case number were survivors alive as of the data of confirmation of survival. Overall survival for each patient is shown below the patient's identification number and best overall response for each patient is also shown below overall survival. HLA, human leukocyte antigen; Prog, progressors; Non-prog, non-progressors; TAA, tumor-associated antigen.



## References for Supplementary Table S2.

1. Andersen MH, Svane IM, Kvistborg P, et al. Immunogenicity of bcl-2 in patients with cancer. *Blood* 2005;105:728-34.
2. Yong AS, Stephens N, Weber G, et al. Improved outcome following allogeneic stem cell transplantation in chronic myeloid leukemia is associated with higher expression of bmi-1 and immune responses to bmi-1 protein. *Leukemia* 2011;25:629-37.
3. Liu KJ, Wang CC, Chen LT, et al. Generation of carcinoembryonic antigen (cea)-specific t-cell responses in hla-a\*0201 and hla-a\*2402 late-stage colorectal cancer patients after vaccination with dendritic cells loaded with cea peptides. *Clin Cancer Res* 2004;10:2645-51.
4. Schuler PJ, Boeckers P, Engers R, et al. Egfr-specific t cell frequencies correlate with egfr expression in head and neck squamous cell carcinoma. *J Transl Med* 2011;9:168.
5. Hatano M, Eguchi J, Tatsumi T, et al. Epha2 as a glioma-associated antigen: A novel target for glioma vaccines. *Neoplasia* 2005;7:717-22.
6. Voutsas IF, Anastasopoulou EA, Tzonis P, et al. Unraveling the role of preexisting immunity in prostate cancer patients vaccinated with a her-2/neu hybrid peptide. *J Immunother Cancer* 2016;4:75.
7. Kono K, Rongcun Y, Charo J, et al. Identification of her2/neu-derived peptide epitopes recognized by gastric cancer-specific cytotoxic t lymphocytes. *Int J Cancer* 1998;78:202-8.
8. Sawada Y, Komori H, Tsunoda Y, et al. Identification of hla-a2 or hla-a24-restricted ctl epitopes for potential hsp105-targeted immunotherapy in colorectal cancer. *Oncol Rep* 2014;31:1051-8.
9. Huang LQ, Brasseur F, Serrano A, et al. Cytolytic t lymphocytes recognize an antigen encoded by mage-a10 on a human melanoma. *J Immunol* 1999;162:6849-54.
10. Chinnasamy N, Wargo JA, Yu Z, et al. A tcr targeting the hla-a\*0201-restricted epitope of mage-a3 recognizes multiple epitopes of the mage-a antigen superfamily in several types of cancer. *J Immunol* 2011;186:685-96.
11. Duffour MT, Chauv P, Lurquin C, et al. A mage-a4 peptide presented by hla-a2 is recognized by cytolytic t lymphocytes. *Eur J Immunol* 1999;29:3329-37.
12. Zhou G, Sprengers D, Boor PPC, et al. Antibodies against immune checkpoint molecules restore functions of tumor-infiltrating t cells in hepatocellular carcinomas. *Gastroenterology* 2017;153:1107-1119.e10.
13. Laheru D, Lutz E, Burke J, et al. Allogeneic granulocyte macrophage colony-stimulating factor-secreting tumor immunotherapy alone or in sequence with cyclophosphamide for metastatic pancreatic cancer: A pilot study of safety, feasibility, and immune activation. *Clin Cancer Res* 2008;14:1455-63.
14. Bolonaki I, Kotsakis A, Papadimitraki E, et al. Vaccination of patients with advanced non-

- small-cell lung cancer with an optimized cryptic human telomerase reverse transcriptase peptide. *J Clin Oncol* 2007;25:2727-34.
15. Correa I, Plunkett T, Coleman J, et al. Responses of human t cells to peptides flanking the tandem repeat and overlapping the signal sequence of muc1. *Int J Cancer* 2005;115:760-8.
  16. Purbhoo MA, Sutton DH, Brewer JE, et al. Quantifying and imaging ny-eso-1/lage-1-derived epitopes on tumor cells using high affinity t cell receptors. *J Immunol* 2006;176:7308-16.
  17. Svane IM, Pedersen AE, Nikolajsen K, et al. Alterations in p53-specific t cells and other lymphocyte subsets in breast cancer patients during vaccination with p53-peptide loaded dendritic cells and low-dose interleukin-2. *Vaccine* 2008;26:4716-24.
  18. Rezvani K, Yong AS, Tawab A, et al. Ex vivo characterization of polyclonal memory cd8+ t-cell responses to prame-specific peptides in patients with acute lymphoblastic leukemia and acute and chronic myeloid leukemia. *Blood* 2009;113:2245-55.
  19. Turksma AW, Bontkes HJ, Ruizendaal JJ, et al. Exploring dendritic cell based vaccines targeting survivin for the treatment of head and neck cancer patients. *J Transl Med* 2013;11:152.
  20. Wenandy L, Sørensen RB, Sengeløv L, et al. The immunogenicity of the htert540-548 peptide in cancer. *Clin Cancer Res* 2008;14:4-7.
  21. Gillmore R, Xue SA, Holler A, et al. Detection of wilms' tumor antigen--specific ctl in tumor-draining lymph nodes of patients with early breast cancer. *Clin Cancer Res* 2006;12:34-42.
  22. Hill GR, Tey SK, Beagley L, et al. Successful immunotherapy of hcmv disease using virus-specific t cells expanded from an allogeneic stem cell transplant recipient. *Am J Transplant* 2010;10:173-9.
  23. Ahmed M, Lopez-Albaitero A, Pankov D, et al. Tcr-mimic bispecific antibodies targeting Imp2a show potent activity against ebv malignancies. *JCI Insight* 2018;3.
  24. Kono K, Takahashi A, Sugai H, et al. Dendritic cells pulsed with her-2/neu-derived peptides can induce specific t-cell responses in patients with gastric cancer. *Clin Cancer Res* 2002;8:3394-400.
  25. Akatsuka Y, Nishida T, Kondo E, et al. Identification of a polymorphic gene, bcl2a1, encoding two novel hematopoietic lineage-specific minor histocompatibility antigens. *J Exp Med* 2003;197:1489-500.
  26. Uemura H, Fujimoto K, Tanaka M, et al. A phase i trial of vaccination of ca9-derived peptides for hla-a24-positive patients with cytokine-refractory metastatic renal cell carcinoma. *Clin Cancer Res* 2006;12:1768-75.
  27. Matsuda K, Tsunoda T, Tanaka H, et al. Enhancement of cytotoxic t-lymphocyte responses in patients with gastrointestinal malignancies following vaccination with cea peptide-pulsed dendritic cells. *Cancer Immunol Immunother* 2004;53:609-16.
  28. Fujiwara Y, Okada K, Omori T, et al. Multiple therapeutic peptide vaccines for patients with

- advanced gastric cancer. *Int J Oncol* 2017;50:1655-1662.
29. Komori H, Nakatsura T, Senju S, et al. Identification of hla-a2- or hla-a24-restricted ctl epitopes possibly useful for glypican-3-specific immunotherapy of hepatocellular carcinoma. *Clin Cancer Res* 2006;12:2689-97.
30. Nagata Y, Furugen R, Hiasa A, et al. Peptides derived from a wild-type murine proto-oncogene c-erbB-2/her2/neu can induce ctl and tumor suppression in syngeneic hosts. *J Immunol* 1997;159:1336-43.
31. [https://www.creativebiolabs.net/symbolsearch\\_KIF20A\\_62.htm](https://www.creativebiolabs.net/symbolsearch_KIF20A_62.htm).
32. Tahara K, Takesako K, Sette A, et al. Identification of a mage-2-encoded human leukocyte antigen-a24-binding synthetic peptide that induces specific antitumor cytotoxic t lymphocytes. *Clin Cancer Res* 1999;5:2236-41.
33. Goodyear OC, Pratt G, McLarnon A, et al. Differential pattern of cd4+ and cd8+ t-cell immunity to mage-a1/a2/a3 in patients with monoclonal gammopathy of undetermined significance (mgus) and multiple myeloma. *Blood* 2008;112:3362-72.
34. Takeuchi S, Kagabu M, Shoji T, et al. Anti-cancer immunotherapy using cancer-derived multiple epitope-peptides cocktail vaccination clinical studies in patients with refractory/persistent disease of uterine cervical cancer and ovarian cancer [phase 2]. *Oncoimmunology* 2020;9:1838189.
35. Osawa R, Tsunoda T, Yoshimura S, et al. Identification of hla-a24-restricted novel t cell epitope peptides derived from p-cadherin and kinesin family member 20a. *J Biomed Biotechnol* 2012;2012:848042.
36. Hirohashi Y, Torigoe T, Maeda A, et al. An hla-a24-restricted cytotoxic t lymphocyte epitope of a tumor-associated protein, survivin. *Clin Cancer Res* 2002;8:1731-9.
37. Nakamoto Y, Mizukoshi E, Tsuji H, et al. Combined therapy of transcatheter hepatic arterial embolization with intratumoral dendritic cell infusion for hepatocellular carcinoma: Clinical safety. *Clin Exp Immunol* 2007;147:296-305.
38. Mimura K, Shiraiishi K, Mueller A, et al. The mapk pathway is a predominant regulator of hla-a expression in esophageal and gastric cancer. *J Immunol* 2013;191:6261-72.
39. Hazama S, Nakamura Y, Takenouchi H, et al. A phase i study of combination vaccine treatment of five therapeutic epitope-peptides for metastatic colorectal cancer; safety, immunological response, and clinical outcome. *J Transl Med* 2014;12:63.
40. Lu X, Liu J, Cui P, et al. Co-inhibition of tigit, pd1, and tim3 reverses dysfunction of wilms tumor protein-1 (wt1)-specific cd8+ t lymphocytes after dendritic cell vaccination in gastric cancer. *Am J Cancer Res* 2018;8:1564-1575.
41. Masuoka M, Yoshimuta T, Hamada M, et al. Identification of the hla-a24 peptide epitope within cytomegalovirus protein pp65 recognized by cmv-specific cytotoxic t lymphocytes. *Viral*

*Immunol* 2001;14:369-77.

42. Kirchner A, Hoffmeister B, Cherepnev GG, et al. Dissection of the cmv specific t-cell response is required for optimized cardiac transplant monitoring. *J Med Virol* 2008;80:1604-14.
43. Kuzushima K, Nakamura S, Nakamura T, et al. Increased frequency of antigen-specific cd8(+) cytotoxic t lymphocytes infiltrating an epstein-barr virus-associated gastric carcinoma. *J Clin Invest* 1999;104:163-71.
44. Kuzushima K, Hayashi N, Kudoh A, et al. Tetramer-assisted identification and characterization of epitopes recognized by hla a\*2402-restricted epstein-barr virus-specific cd8+ t cells. *Blood* 2003;101:1460-8.
45. Liu J, Zhang S, Tan S, et al. Cross-allele cytotoxic t lymphocyte responses against 2009 pandemic h1n1 influenza a virus among hla-a24 and hla-a3 supertype-positive individuals. *J Virol* 2012;86:13281-94.
